# Supplementary material
Source: Springer Nature journal article supplement (https://www.springermedizin.de/resource/supplementary/12911_2013_883_MOESM6_ESM.pdf/9526640)
Supplement: MOESM6 [file 9526640]

| Discrepancy type | N  | Example  |                                                                                                          |                                                                                                        |
|------------------|----|----------|----------------------------------------------------------------------------------------------------------|--------------------------------------------------------------------------------------------------------|
|                  |    | CUI      | MeSH                                                                                                     | ICD10                                                                                                  |
| Reviewer error   | 21 | C0018790 | <br>Heart arrest        | <br>Cardiac arrest  |
| UMLS error       | 11 | C0020610 | <br>Lactation disorders | <br>Hypogalactia    |
| VCM error        | 3  | C0005604 | <br>Varicocele          | <br>Scrotal varices |

VCM does not allow the combination of ICD10 icon.
